# Supplementary material
Source: publisher figshare collection journal article supplement (https://tandf.figshare.com/articles/dataset/_/8019875)
Supplement: Supplementary file 1 [file 2]

Table S.1: Empirical size of the tests with AR(2) errors:  $u_t = \phi_1 u_{t-1} + \phi_2 u_{t-2} + \varepsilon_t$ ,  $\varepsilon_t \sim i.i.d.N\left(0, \frac{(1+\phi_2)\{(1-\phi_2)^2 - \phi_1^2\}}{1-\phi_2}\right)$  with  $\phi_2 = -0.3$

|           |                            | $\phi_1 = 0.3$ | $\phi_1 = 0.5$ | $\phi_1 = 0.7$ | $\phi_1 = 0.9$ | $\phi_1 = 1.1$ |
|-----------|----------------------------|----------------|----------------|----------------|----------------|----------------|
| $T = 100$ | $CUSUM_{H_0}$              | 0.010          | 0.014          | 0.015          | 0.007          | 0.006          |
|           | $CUSUM_{JX} (c = 1)$       | 0.018          | 0.041          | 0.073          | 0.117          | 0.256          |
|           | $CUSUM_{JX} (c = 2)$       | 0.013          | 0.024          | 0.037          | 0.044          | 0.075          |
|           | $CUSUM_{JX} (c = 3)$       | 0.011          | 0.017          | 0.024          | 0.017          | 0.014          |
|           | $CUSUM^* (c = 1, d = 1)$   | 0.043          | 0.096          | 0.155          | 0.253          | 0.578          |
|           | $CUSUM^* (c = 2, d = 1)$   | 0.036          | 0.070          | 0.106          | 0.162          | 0.404          |
|           | $CUSUM^* (c = 3, d = 1)$   | 0.032          | 0.060          | 0.087          | 0.132          | 0.353          |
|           | $CUSUM^* (c = 1, d = 1.5)$ | 0.021          | 0.049          | 0.086          | 0.143          | 0.361          |
|           | $CUSUM^* (c = 2, d = 1.5)$ | 0.016          | 0.030          | 0.047          | 0.068          | 0.176          |
|           | $CUSUM^* (c = 3, d = 1.5)$ | 0.013          | 0.022          | 0.035          | 0.036          | 0.087          |
|           | $CUSUM^* (c = 1, d = 2)$   | 0.019          | 0.043          | 0.075          | 0.119          | 0.285          |
|           | $CUSUM^* (c = 2, d = 2)$   | 0.013          | 0.025          | 0.038          | 0.050          | 0.102          |
|           | $CUSUM^* (c = 3, d = 2)$   | 0.011          | 0.017          | 0.025          | 0.019          | 0.024          |
| $T = 200$ | $CUSUM_{H_0}$              | 0.019          | 0.026          | 0.027          | 0.020          | 0.005          |
|           | $CUSUM_{JX} (c = 1)$       | 0.026          | 0.049          | 0.068          | 0.093          | 0.176          |
|           | $CUSUM_{JX} (c = 2)$       | 0.022          | 0.039          | 0.043          | 0.052          | 0.073          |
|           | $CUSUM_{JX} (c = 3)$       | 0.021          | 0.032          | 0.035          | 0.035          | 0.028          |
|           | $CUSUM^* (c = 1, d = 1)$   | 0.048          | 0.083          | 0.116          | 0.171          | 0.399          |
|           | $CUSUM^* (c = 2, d = 1)$   | 0.042          | 0.069          | 0.089          | 0.126          | 0.291          |
|           | $CUSUM^* (c = 3, d = 1)$   | 0.038          | 0.061          | 0.077          | 0.108          | 0.245          |
|           | $CUSUM^* (c = 1, d = 1.5)$ | 0.030          | 0.054          | 0.074          | 0.108          | 0.233          |
|           | $CUSUM^* (c = 2, d = 1.5)$ | 0.025          | 0.042          | 0.050          | 0.065          | 0.130          |
|           | $CUSUM^* (c = 3, d = 1.5)$ | 0.023          | 0.036          | 0.041          | 0.046          | 0.076          |
|           | $CUSUM^* (c = 1, d = 2)$   | 0.026          | 0.049          | 0.068          | 0.095          | 0.189          |
|           | $CUSUM^* (c = 2, d = 2)$   | 0.023          | 0.039          | 0.044          | 0.055          | 0.084          |
|           | $CUSUM^* (c = 3, d = 2)$   | 0.021          | 0.032          | 0.036          | 0.036          | 0.040          |
| $T = 300$ | $CUSUM_{H_0}$              | 0.018          | 0.025          | 0.023          | 0.020          | 0.014          |
|           | $CUSUM_{JX} (c = 1)$       | 0.025          | 0.041          | 0.056          | 0.075          | 0.123          |
|           | $CUSUM_{JX} (c = 2)$       | 0.023          | 0.034          | 0.041          | 0.045          | 0.068          |
|           | $CUSUM_{JX} (c = 3)$       | 0.021          | 0.030          | 0.031          | 0.031          | 0.034          |
|           | $CUSUM^* (c = 1, d = 1)$   | 0.042          | 0.070          | 0.096          | 0.144          | 0.325          |
|           | $CUSUM^* (c = 2, d = 1)$   | 0.040          | 0.057          | 0.074          | 0.107          | 0.230          |
|           | $CUSUM^* (c = 3, d = 1)$   | 0.036          | 0.053          | 0.068          | 0.088          | 0.193          |
|           | $CUSUM^* (c = 1, d = 1.5)$ | 0.026          | 0.042          | 0.060          | 0.086          | 0.169          |
|           | $CUSUM^* (c = 2, d = 1.5)$ | 0.024          | 0.035          | 0.045          | 0.056          | 0.094          |
|           | $CUSUM^* (c = 3, d = 1.5)$ | 0.022          | 0.032          | 0.035          | 0.038          | 0.065          |
|           | $CUSUM^* (c = 1, d = 2)$   | 0.025          | 0.041          | 0.057          | 0.076          | 0.132          |
|           | $CUSUM^* (c = 2, d = 2)$   | 0.023          | 0.034          | 0.041          | 0.046          | 0.072          |
|           | $CUSUM^* (c = 3, d = 2)$   | 0.021          | 0.030          | 0.031          | 0.032          | 0.040          |

Table S.1 (continued)

|            |                            | $\phi_1 = 0.3$ | $\phi_1 = 0.5$ | $\phi_1 = 0.7$ | $\phi_1 = 0.9$ | $\phi_1 = 1.1$ |
|------------|----------------------------|----------------|----------------|----------------|----------------|----------------|
| $T = 500$  | $CUSUM_{H_0}$              | 0.030          | 0.035          | 0.036          | 0.032          | 0.025          |
|            | $CUSUM_{JX} (c = 1)$       | 0.035          | 0.044          | 0.055          | 0.071          | 0.100          |
|            | $CUSUM_{JX} (c = 2)$       | 0.033          | 0.040          | 0.047          | 0.056          | 0.061          |
|            | $CUSUM_{JX} (c = 3)$       | 0.032          | 0.038          | 0.043          | 0.044          | 0.050          |
|            | $CUSUM^* (c = 1, d = 1)$   | 0.044          | 0.061          | 0.079          | 0.117          | 0.238          |
|            | $CUSUM^* (c = 2, d = 1)$   | 0.042          | 0.053          | 0.068          | 0.098          | 0.182          |
|            | $CUSUM^* (c = 3, d = 1)$   | 0.040          | 0.052          | 0.062          | 0.085          | 0.155          |
|            | $CUSUM^* (c = 1, d = 1.5)$ | 0.036          | 0.046          | 0.056          | 0.077          | 0.129          |
|            | $CUSUM^* (c = 2, d = 1.5)$ | 0.033          | 0.041          | 0.050          | 0.060          | 0.084          |
|            | $CUSUM^* (c = 3, d = 1.5)$ | 0.032          | 0.040          | 0.044          | 0.048          | 0.063          |
|            | $CUSUM^* (c = 1, d = 2)$   | 0.035          | 0.044          | 0.055          | 0.071          | 0.104          |
|            | $CUSUM^* (c = 2, d = 2)$   | 0.033          | 0.041          | 0.047          | 0.056          | 0.064          |
|            | $CUSUM^* (c = 3, d = 2)$   | 0.032          | 0.038          | 0.043          | 0.045          | 0.051          |
|            |                            |                |                |                |                |                |
| $T = 1000$ | $CUSUM_{H_0}$              | 0.030          | 0.038          | 0.038          | 0.036          | 0.031          |
|            | $CUSUM_{JX} (c = 1)$       | 0.034          | 0.046          | 0.050          | 0.059          | 0.085          |
|            | $CUSUM_{JX} (c = 2)$       | 0.032          | 0.041          | 0.044          | 0.049          | 0.060          |
|            | $CUSUM_{JX} (c = 3)$       | 0.031          | 0.041          | 0.042          | 0.045          | 0.050          |
|            | $CUSUM^* (c = 1, d = 1)$   | 0.040          | 0.058          | 0.072          | 0.091          | 0.170          |
|            | $CUSUM^* (c = 2, d = 1)$   | 0.039          | 0.050          | 0.059          | 0.075          | 0.136          |
|            | $CUSUM^* (c = 3, d = 1)$   | 0.036          | 0.048          | 0.055          | 0.068          | 0.126          |
|            | $CUSUM^* (c = 1, d = 1.5)$ | 0.035          | 0.046          | 0.051          | 0.060          | 0.100          |
|            | $CUSUM^* (c = 2, d = 1.5)$ | 0.032          | 0.042          | 0.045          | 0.050          | 0.071          |
|            | $CUSUM^* (c = 3, d = 1.5)$ | 0.032          | 0.041          | 0.043          | 0.046          | 0.060          |
|            | $CUSUM^* (c = 1, d = 2)$   | 0.034          | 0.046          | 0.050          | 0.059          | 0.087          |
|            | $CUSUM^* (c = 2, d = 2)$   | 0.032          | 0.041          | 0.044          | 0.049          | 0.060          |
|            | $CUSUM^* (c = 3, d = 2)$   | 0.031          | 0.041          | 0.042          | 0.045          | 0.050          |
|            |                            |                |                |                |                |                |

Table S.2: Empirical size of the tests with AR(2) errors:  $u_t = \phi_1 u_{t-1} + \phi_2 u_{t-2} + \varepsilon_t$ ,  $\varepsilon_t \sim i.i.d.N\left(0, \frac{(1+\phi_2)\{(1-\phi_2)^2 - \phi_1^2\}}{1-\phi_2}\right)$  with  $\phi_2 = 0.3$

|           |                            | $\phi_1 = -0.3$ | $\phi_1 = -0.1$ | $\phi_1 = 0.1$ | $\phi_1 = 0.3$ | $\phi_1 = 0.5$ |
|-----------|----------------------------|-----------------|-----------------|----------------|----------------|----------------|
| $T = 100$ | $CUSUM_{H_0}$              | 0.068           | 0.116           | 0.141          | 0.077          | 0.025          |
|           | $CUSUM_{JX} (c = 1)$       | 0.110           | 0.155           | 0.219          | 0.212          | 0.289          |
|           | $CUSUM_{JX} (c = 2)$       | 0.088           | 0.133           | 0.171          | 0.137          | 0.128          |
|           | $CUSUM_{JX} (c = 3)$       | 0.077           | 0.125           | 0.154          | 0.110          | 0.058          |
|           | $CUSUM^* (c = 1, d = 1)$   | 0.186           | 0.257           | 0.350          | 0.395          | 0.599          |
|           | $CUSUM^* (c = 2, d = 1)$   | 0.162           | 0.231           | 0.294          | 0.302          | 0.461          |
|           | $CUSUM^* (c = 3, d = 1)$   | 0.157           | 0.225           | 0.280          | 0.276          | 0.429          |
|           | $CUSUM^* (c = 1, d = 1.5)$ | 0.127           | 0.167           | 0.245          | 0.255          | 0.394          |
|           | $CUSUM^* (c = 2, d = 1.5)$ | 0.101           | 0.146           | 0.194          | 0.172          | 0.240          |
|           | $CUSUM^* (c = 3, d = 1.5)$ | 0.089           | 0.139           | 0.177          | 0.143          | 0.181          |
|           | $CUSUM^* (c = 1, d = 2)$   | 0.111           | 0.156           | 0.223          | 0.221          | 0.319          |
|           | $CUSUM^* (c = 2, d = 2)$   | 0.090           | 0.135           | 0.173          | 0.142          | 0.162          |
|           | $CUSUM^* (c = 3, d = 2)$   | 0.079           | 0.128           | 0.157          | 0.114          | 0.085          |
| $T = 200$ | $CUSUM_{H_0}$              | 0.079           | 0.138           | 0.165          | 0.094          | 0.041          |
|           | $CUSUM_{JX} (c = 1)$       | 0.105           | 0.158           | 0.215          | 0.180          | 0.227          |
|           | $CUSUM_{JX} (c = 2)$       | 0.093           | 0.148           | 0.194          | 0.132          | 0.130          |
|           | $CUSUM_{JX} (c = 3)$       | 0.085           | 0.141           | 0.178          | 0.113          | 0.077          |
|           | $CUSUM^* (c = 1, d = 1)$   | 0.160           | 0.226           | 0.299          | 0.303          | 0.506          |
|           | $CUSUM^* (c = 2, d = 1)$   | 0.146           | 0.213           | 0.269          | 0.247          | 0.407          |
|           | $CUSUM^* (c = 3, d = 1)$   | 0.138           | 0.207           | 0.258          | 0.227          | 0.383          |
|           | $CUSUM^* (c = 1, d = 1.5)$ | 0.111           | 0.164           | 0.223          | 0.198          | 0.304          |
|           | $CUSUM^* (c = 2, d = 1.5)$ | 0.096           | 0.153           | 0.203          | 0.154          | 0.198          |
|           | $CUSUM^* (c = 3, d = 1.5)$ | 0.091           | 0.147           | 0.192          | 0.132          | 0.161          |
|           | $CUSUM^* (c = 1, d = 2)$   | 0.106           | 0.158           | 0.216          | 0.182          | 0.239          |
|           | $CUSUM^* (c = 2, d = 2)$   | 0.093           | 0.148           | 0.194          | 0.135          | 0.149          |
|           | $CUSUM^* (c = 3, d = 2)$   | 0.085           | 0.141           | 0.181          | 0.115          | 0.092          |
| $T = 300$ | $CUSUM_{H_0}$              | 0.072           | 0.136           | 0.158          | 0.090          | 0.054          |
|           | $CUSUM_{JX} (c = 1)$       | 0.091           | 0.148           | 0.203          | 0.151          | 0.182          |
|           | $CUSUM_{JX} (c = 2)$       | 0.082           | 0.142           | 0.173          | 0.121          | 0.111          |
|           | $CUSUM_{JX} (c = 3)$       | 0.078           | 0.142           | 0.164          | 0.106          | 0.077          |
|           | $CUSUM^* (c = 1, d = 1)$   | 0.135           | 0.197           | 0.270          | 0.241          | 0.440          |
|           | $CUSUM^* (c = 2, d = 1)$   | 0.122           | 0.188           | 0.243          | 0.205          | 0.350          |
|           | $CUSUM^* (c = 3, d = 1)$   | 0.118           | 0.186           | 0.232          | 0.189          | 0.312          |
|           | $CUSUM^* (c = 1, d = 1.5)$ | 0.097           | 0.152           | 0.210          | 0.167          | 0.250          |
|           | $CUSUM^* (c = 2, d = 1.5)$ | 0.086           | 0.145           | 0.181          | 0.132          | 0.163          |
|           | $CUSUM^* (c = 3, d = 1.5)$ | 0.082           | 0.144           | 0.171          | 0.121          | 0.134          |
|           | $CUSUM^* (c = 1, d = 2)$   | 0.092           | 0.148           | 0.203          | 0.154          | 0.195          |
|           | $CUSUM^* (c = 2, d = 2)$   | 0.082           | 0.142           | 0.174          | 0.122          | 0.123          |
|           | $CUSUM^* (c = 3, d = 2)$   | 0.078           | 0.142           | 0.164          | 0.108          | 0.090          |

Table S.2 (continued)

|            |                            | $\phi_1 = -0.3$ | $\phi_1 = -0.1$ | $\phi_1 = 0.1$ | $\phi_1 = 0.3$ | $\phi_1 = 0.5$ |
|------------|----------------------------|-----------------|-----------------|----------------|----------------|----------------|
| $T = 500$  | $CUSUM_{H_0}$              | 0.072           | 0.124           | 0.158          | 0.095          | 0.072          |
|            | $CUSUM_{JX} (c = 1)$       | 0.084           | 0.134           | 0.187          | 0.136          | 0.154          |
|            | $CUSUM_{JX} (c = 2)$       | 0.079           | 0.128           | 0.173          | 0.113          | 0.113          |
|            | $CUSUM_{JX} (c = 3)$       | 0.075           | 0.127           | 0.168          | 0.103          | 0.094          |
|            | $CUSUM^* (c = 1, d = 1)$   | 0.116           | 0.170           | 0.235          | 0.204          | 0.340          |
|            | $CUSUM^* (c = 2, d = 1)$   | 0.113           | 0.162           | 0.218          | 0.180          | 0.286          |
|            | $CUSUM^* (c = 3, d = 1)$   | 0.109           | 0.161           | 0.213          | 0.173          | 0.268          |
|            | $CUSUM^* (c = 1, d = 1.5)$ | 0.086           | 0.137           | 0.192          | 0.141          | 0.188          |
|            | $CUSUM^* (c = 2, d = 1.5)$ | 0.080           | 0.131           | 0.177          | 0.122          | 0.149          |
|            | $CUSUM^* (c = 3, d = 1.5)$ | 0.077           | 0.129           | 0.170          | 0.110          | 0.131          |
|            | $CUSUM^* (c = 1, d = 2)$   | 0.084           | 0.134           | 0.188          | 0.136          | 0.160          |
|            | $CUSUM^* (c = 2, d = 2)$   | 0.079           | 0.128           | 0.174          | 0.114          | 0.119          |
|            | $CUSUM^* (c = 3, d = 2)$   | 0.075           | 0.127           | 0.168          | 0.104          | 0.099          |
|            |                            |                 |                 |                |                |                |
| $T = 1000$ | $CUSUM_{H_0}$              | 0.074           | 0.121           | 0.145          | 0.095          | 0.078          |
|            | $CUSUM_{JX} (c = 1)$       | 0.084           | 0.126           | 0.158          | 0.115          | 0.130          |
|            | $CUSUM_{JX} (c = 2)$       | 0.080           | 0.124           | 0.151          | 0.104          | 0.105          |
|            | $CUSUM_{JX} (c = 3)$       | 0.078           | 0.122           | 0.148          | 0.100          | 0.092          |
|            | $CUSUM^* (c = 1, d = 1)$   | 0.098           | 0.144           | 0.181          | 0.157          | 0.250          |
|            | $CUSUM^* (c = 2, d = 1)$   | 0.095           | 0.141           | 0.170          | 0.140          | 0.217          |
|            | $CUSUM^* (c = 3, d = 1)$   | 0.092           | 0.139           | 0.168          | 0.136          | 0.212          |
|            | $CUSUM^* (c = 1, d = 1.5)$ | 0.084           | 0.126           | 0.161          | 0.117          | 0.141          |
|            | $CUSUM^* (c = 2, d = 1.5)$ | 0.081           | 0.125           | 0.153          | 0.106          | 0.126          |
|            | $CUSUM^* (c = 3, d = 1.5)$ | 0.079           | 0.123           | 0.150          | 0.103          | 0.115          |
|            | $CUSUM^* (c = 1, d = 2)$   | 0.084           | 0.126           | 0.158          | 0.115          | 0.131          |
|            | $CUSUM^* (c = 2, d = 2)$   | 0.080           | 0.124           | 0.151          | 0.104          | 0.108          |
|            | $CUSUM^* (c = 3, d = 2)$   | 0.078           | 0.122           | 0.148          | 0.100          | 0.094          |
|            |                            |                 |                 |                |                |                |

Table S.3: Empirical size of the tests with MA(1) errors:  $u_t = \varepsilon_t + \theta\varepsilon_{t-1}$  with  $\varepsilon_t \sim i.i.d.N\left(0, \frac{1}{1+\theta}\right)$

|           |                            | $\theta = -0.8$ | $\theta = -0.4$ | $\theta = 0$ | $\theta = 0.4$ | $\theta = 0.8$ |
|-----------|----------------------------|-----------------|-----------------|--------------|----------------|----------------|
| $T = 100$ | $CUSUM_{H_0}$              | 0.000           | 0.006           | 0.028        | 0.023          | 0.020          |
|           | $CUSUM_{JX} (c = 1)$       | 0.000           | 0.014           | 0.047        | 0.067          | 0.083          |
|           | $CUSUM_{JX} (c = 2)$       | 0.000           | 0.008           | 0.034        | 0.041          | 0.043          |
|           | $CUSUM_{JX} (c = 3)$       | 0.000           | 0.006           | 0.031        | 0.030          | 0.031          |
|           | $CUSUM^* (c = 1, d = 1)$   | 0.000           | 0.031           | 0.098        | 0.139          | 0.166          |
|           | $CUSUM^* (c = 2, d = 1)$   | 0.000           | 0.024           | 0.082        | 0.104          | 0.118          |
|           | $CUSUM^* (c = 3, d = 1)$   | 0.000           | 0.020           | 0.077        | 0.094          | 0.102          |
|           | $CUSUM^* (c = 1, d = 1.5)$ | 0.000           | 0.016           | 0.057        | 0.079          | 0.097          |
|           | $CUSUM^* (c = 2, d = 1.5)$ | 0.000           | 0.010           | 0.040        | 0.054          | 0.060          |
|           | $CUSUM^* (c = 3, d = 1.5)$ | 0.000           | 0.008           | 0.035        | 0.041          | 0.040          |
|           | $CUSUM^* (c = 1, d = 2)$   | 0.000           | 0.014           | 0.048        | 0.068          | 0.085          |
|           | $CUSUM^* (c = 2, d = 2)$   | 0.000           | 0.008           | 0.034        | 0.042          | 0.046          |
|           | $CUSUM^* (c = 3, d = 2)$   | 0.000           | 0.006           | 0.031        | 0.031          | 0.031          |
| $T = 200$ | $CUSUM_{H_0}$              | 0.000           | 0.013           | 0.038        | 0.038          | 0.034          |
|           | $CUSUM_{JX} (c = 1)$       | 0.000           | 0.017           | 0.046        | 0.061          | 0.067          |
|           | $CUSUM_{JX} (c = 2)$       | 0.000           | 0.016           | 0.042        | 0.050          | 0.052          |
|           | $CUSUM_{JX} (c = 3)$       | 0.000           | 0.014           | 0.041        | 0.043          | 0.041          |
|           | $CUSUM^* (c = 1, d = 1)$   | 0.000           | 0.028           | 0.077        | 0.103          | 0.119          |
|           | $CUSUM^* (c = 2, d = 1)$   | 0.000           | 0.026           | 0.070        | 0.090          | 0.094          |
|           | $CUSUM^* (c = 3, d = 1)$   | 0.000           | 0.023           | 0.068        | 0.080          | 0.084          |
|           | $CUSUM^* (c = 1, d = 1.5)$ | 0.000           | 0.018           | 0.049        | 0.066          | 0.077          |
|           | $CUSUM^* (c = 2, d = 1.5)$ | 0.000           | 0.016           | 0.044        | 0.053          | 0.056          |
|           | $CUSUM^* (c = 3, d = 1.5)$ | 0.000           | 0.015           | 0.041        | 0.045          | 0.044          |
|           | $CUSUM^* (c = 1, d = 2)$   | 0.000           | 0.017           | 0.046        | 0.061          | 0.068          |
|           | $CUSUM^* (c = 2, d = 2)$   | 0.000           | 0.016           | 0.042        | 0.050          | 0.052          |
|           | $CUSUM^* (c = 3, d = 2)$   | 0.000           | 0.014           | 0.041        | 0.043          | 0.042          |
| $T = 300$ | $CUSUM_{H_0}$              | 0.000           | 0.013           | 0.042        | 0.038          | 0.035          |
|           | $CUSUM_{JX} (c = 1)$       | 0.000           | 0.018           | 0.047        | 0.062          | 0.064          |
|           | $CUSUM_{JX} (c = 2)$       | 0.000           | 0.015           | 0.046        | 0.050          | 0.052          |
|           | $CUSUM_{JX} (c = 3)$       | 0.000           | 0.014           | 0.045        | 0.047          | 0.044          |
|           | $CUSUM^* (c = 1, d = 1)$   | 0.000           | 0.030           | 0.067        | 0.089          | 0.097          |
|           | $CUSUM^* (c = 2, d = 1)$   | 0.000           | 0.026           | 0.064        | 0.078          | 0.082          |
|           | $CUSUM^* (c = 3, d = 1)$   | 0.000           | 0.023           | 0.062        | 0.074          | 0.074          |
|           | $CUSUM^* (c = 1, d = 1.5)$ | 0.000           | 0.019           | 0.050        | 0.066          | 0.070          |
|           | $CUSUM^* (c = 2, d = 1.5)$ | 0.000           | 0.017           | 0.047        | 0.052          | 0.055          |
|           | $CUSUM^* (c = 3, d = 1.5)$ | 0.000           | 0.014           | 0.046        | 0.049          | 0.047          |
|           | $CUSUM^* (c = 1, d = 2)$   | 0.000           | 0.018           | 0.047        | 0.063          | 0.065          |
|           | $CUSUM^* (c = 2, d = 2)$   | 0.000           | 0.015           | 0.046        | 0.050          | 0.052          |
|           | $CUSUM^* (c = 3, d = 2)$   | 0.000           | 0.014           | 0.045        | 0.047          | 0.044          |

Table S.3 (continued)

|            |                            | $\theta = -0.8$ | $\theta = -0.4$ | $\theta = 0$ | $\theta = 0.4$ | $\theta = 0.8$ |
|------------|----------------------------|-----------------|-----------------|--------------|----------------|----------------|
| $T = 500$  | $CUSUM_{H_0}$              | 0.000           | 0.021           | 0.047        | 0.050          | 0.046          |
|            | $CUSUM_{JX} (c = 1)$       | 0.000           | 0.025           | 0.051        | 0.063          | 0.066          |
|            | $CUSUM_{JX} (c = 2)$       | 0.000           | 0.023           | 0.049        | 0.058          | 0.059          |
|            | $CUSUM_{JX} (c = 3)$       | 0.000           | 0.022           | 0.047        | 0.055          | 0.053          |
|            | $CUSUM^* (c = 1, d = 1)$   | 0.000           | 0.032           | 0.066        | 0.080          | 0.090          |
|            | $CUSUM^* (c = 2, d = 1)$   | 0.000           | 0.030           | 0.065        | 0.075          | 0.076          |
|            | $CUSUM^* (c = 3, d = 1)$   | 0.000           | 0.028           | 0.063        | 0.072          | 0.072          |
|            | $CUSUM^* (c = 1, d = 1.5)$ | 0.000           | 0.025           | 0.052        | 0.065          | 0.067          |
|            | $CUSUM^* (c = 2, d = 1.5)$ | 0.000           | 0.023           | 0.050        | 0.060          | 0.060          |
|            | $CUSUM^* (c = 3, d = 1.5)$ | 0.000           | 0.023           | 0.049        | 0.056          | 0.057          |
|            | $CUSUM^* (c = 1, d = 2)$   | 0.000           | 0.025           | 0.051        | 0.063          | 0.066          |
|            | $CUSUM^* (c = 2, d = 2)$   | 0.000           | 0.023           | 0.049        | 0.058          | 0.059          |
|            | $CUSUM^* (c = 3, d = 2)$   | 0.000           | 0.022           | 0.047        | 0.055          | 0.053          |
|            |                            |                 |                 |              |                |                |
| $T = 1000$ | $CUSUM_{H_0}$              | 0.000           | 0.026           | 0.046        | 0.048          | 0.045          |
|            | $CUSUM_{JX} (c = 1)$       | 0.000           | 0.030           | 0.047        | 0.058          | 0.059          |
|            | $CUSUM_{JX} (c = 2)$       | 0.000           | 0.029           | 0.046        | 0.054          | 0.053          |
|            | $CUSUM_{JX} (c = 3)$       | 0.000           | 0.028           | 0.046        | 0.052          | 0.050          |
|            | $CUSUM^* (c = 1, d = 1)$   | 0.000           | 0.033           | 0.058        | 0.073          | 0.076          |
|            | $CUSUM^* (c = 2, d = 1)$   | 0.000           | 0.032           | 0.057        | 0.068          | 0.069          |
|            | $CUSUM^* (c = 3, d = 1)$   | 0.000           | 0.032           | 0.056        | 0.065          | 0.064          |
|            | $CUSUM^* (c = 1, d = 1.5)$ | 0.000           | 0.030           | 0.048        | 0.058          | 0.059          |
|            | $CUSUM^* (c = 2, d = 1.5)$ | 0.000           | 0.029           | 0.046        | 0.054          | 0.053          |
|            | $CUSUM^* (c = 3, d = 1.5)$ | 0.000           | 0.028           | 0.046        | 0.053          | 0.051          |
|            | $CUSUM^* (c = 1, d = 2)$   | 0.000           | 0.030           | 0.047        | 0.058          | 0.059          |
|            | $CUSUM^* (c = 2, d = 2)$   | 0.000           | 0.029           | 0.046        | 0.054          | 0.053          |
|            | $CUSUM^* (c = 3, d = 2)$   | 0.000           | 0.028           | 0.046        | 0.052          | 0.051          |
|            |                            |                 |                 |              |                |                |
