# Supplementary material
Source: publisher figshare collection journal article supplement (https://tandf.figshare.com/articles/dataset/_/8019875)
Supplement: Supplementary file 3 [file 2]

Supplementary Material for  
“Testing for Shifts in Mean with Monotonic Power against  
Multiple Structural Changes”

Daisuke Yamazaki  
Faculty of Economics  
Kyushu University

December 2018

## Related Lemmas and the Proofs

**Lemma 1** *Under Assumption 1,  $\sup_{1 \leq t \leq T} |u_t| = o_p(T^{1/\kappa^*})$ .*

### Proof of Lemma 1

Let  $c$  be a positive constant. Then,

$$\begin{aligned} P\left(T^{-1/\kappa^*} \sup_{1 \leq t \leq T} |u_t| > c\right) &= P\left(\bigcup_{t=1}^T \{|u_t| > cT^{1/\kappa^*}\}\right) \\ &= P\left(\bigcup_{t=1}^T \{|u_t|^{\kappa^*} > c^{\kappa^*} T\}\right) \\ &\leq \sum_{t=1}^T P(|u_t|^{\kappa^*} > c^{\kappa^*} T) \\ &\leq \sum_{t=1}^T \left[ \frac{1}{c^{\kappa^*} T} E(|u_t|^{\kappa^*} \cdot 1\{|u_t|^{\kappa^*} > c^{\kappa^*} T\}) \right] \\ &\leq \frac{1}{c^{\kappa^*} T} \cdot T \sup_{1 \leq t \leq T} E(|u_t|^{\kappa^*} \cdot 1\{|u_t|^{\kappa^*} > c^{\kappa^*} T\}) \\ &= o(1), \end{aligned}$$

because  $\sup_{1 \leq t \leq T} E(|u_t|^{\kappa^*} \cdot 1\{|u_t|^{\kappa^*} > c^{\kappa^*} T\}) \rightarrow 0$  as  $T \rightarrow \infty$ . ■

**Lemma 2** Let  $\check{u}_t = \frac{\sum_{s=1}^T K(\frac{t-s}{Th}) u_s}{\sum_{s=1}^T K(\frac{t-s}{Th})}$  and  $\check{\theta}_t = \frac{\sum_{s=1}^T K(\frac{t-s}{Th}) \left\{ \theta\left(\frac{t}{T}\right) - \theta\left(\frac{s}{T}\right) \right\}}{\sum_{s=1}^T K(\frac{t-s}{Th})}$ . Then, under Assumptions 1–6, we have

$$\begin{aligned}
(a) \quad & \frac{1}{T} \sum_{t=j+1}^T \check{u}_t \check{u}_{t-j} = \tilde{O}_p\left(\frac{1}{Th}\right), & (b) \quad & \frac{1}{T} \sum_{t=j+1}^T \check{u}_t \check{\theta}_{t-j} = \tilde{O}_p\left(\frac{\eta}{\sqrt{Th}}\right), \\
(c) \quad & \frac{1}{T} \sum_{t=j+1}^T u_t \check{\theta}_{t-j} = \tilde{O}_p\left(\frac{\eta}{\sqrt{T}}\right), & (d) \quad & \frac{1}{T} \sum_{t=j+1}^T u_t \check{u}_{t-j} = \tilde{O}_p\left(\frac{1}{Th}\right), \\
(e) \quad & \frac{1}{T} \sum_{t=j+1}^T \check{\theta}_t \check{\theta}_{t-j} = O_p(h\eta^2).
\end{aligned}$$

### Proof of Lemma 2

Let us define

$$\check{\check{u}}_t = \frac{1}{Th} \sum_{s=1}^T K\left(\frac{t-s}{Th}\right) u_s, \quad (1)$$

$$\check{\check{\theta}}_t = \frac{1}{Th} \sum_{s=1}^T K\left(\frac{t-s}{Th}\right) \left\{ \theta\left(\frac{t}{T}\right) - \theta\left(\frac{s}{T}\right) \right\}. \quad (2)$$

Then, we have  $\check{u}_t \sim \check{\check{u}}_t$  and  $\check{\theta}_t \sim \check{\check{\theta}}_t$  uniformly in  $t$ , where “ $\sim$ ” denotes equivalence of the (stochastic) order; that is,  $A \sim B$  implies  $A/B = O_p(1)$  or  $A/B = O(1)$ . Therefore, we have

$$\begin{aligned}
(a') \quad & \frac{1}{T} \sum_{t=j+1}^T \check{u}_t \check{u}_{t-j} \sim \frac{1}{T} \sum_{t=j+1}^T \check{\check{u}}_t \check{\check{u}}_{t-j}, \\
(b') \quad & \frac{1}{T} \sum_{t=j+1}^T \check{u}_t \check{\theta}_{t-j} \sim \frac{1}{T} \sum_{t=j+1}^T \check{\check{u}}_t \check{\check{\theta}}_{t-j}, \\
(c') \quad & \frac{1}{T} \sum_{t=j+1}^T u_t \check{\theta}_{t-j} \sim \frac{1}{T} \sum_{t=j+1}^T u_t \check{\check{\theta}}_{t-j}, \\
(d') \quad & \frac{1}{T} \sum_{t=j+1}^T u_t \check{u}_{t-j} \sim \frac{1}{T} \sum_{t=j+1}^T u_t \check{\check{u}}_{t-j}, \\
(e') \quad & \frac{1}{T} \sum_{t=j+1}^T \check{\theta}_t \check{\theta}_{t-j} \sim \frac{1}{T} \sum_{t=j+1}^T \check{\check{\theta}}_t \check{\check{\theta}}_{t-j}.
\end{aligned}$$

### Proofs of (a) and (d).

Using (a') and (d'), we can prove (a) and (d) in the same way as in Lemmas A.1 and A.4 in Juhl and Xiao (2009), so we omit the proofs.

**Proof of (b).**

Let us define  $T_i = \lfloor \lambda_i T \rfloor$  for  $i = 0, \dots, m+1$ . Since  $\theta(t/T) = \mu + [c_1 + \sum_{i=1}^m (c_{i+1} - c_i) \cdot 1\{t > T_i\}] \cdot \eta$ , we have

$$\begin{aligned} \theta\left(\frac{t}{T}\right) - \theta\left(\frac{s}{T}\right) &= \sum_{i=1}^m (c_{i+1} - c_i) [1\{t > T_i\} - 1\{s > T_i\}] \eta \\ &= \sum_{i=1}^m (c_{i+1} - c_i) [1\{s \leq T_i < t\} - 1\{t \leq T_i < s\}] \eta. \end{aligned}$$

Therefore, we have

$$\begin{aligned} \check{\theta}_t &= \frac{\eta}{Th} \sum_{s=1}^T K\left(\frac{t-s}{Th}\right) \left[ \sum_{i=1}^m (c_{i+1} - c_i) \cdot 1\left\{\frac{s}{T} \leq \lambda_i\right\} \cdot 1\left\{\frac{t}{T} > \lambda_i\right\} \right] \\ &\quad - \frac{\eta}{Th} \sum_{s=1}^T K\left(\frac{t-s}{Th}\right) \left[ \sum_{i=1}^m (c_{i+1} - c_i) \cdot 1\left\{\frac{s}{T} > \lambda_i\right\} \cdot 1\left\{\frac{t}{T} \leq \lambda_i\right\} \right] \\ &= (\text{A1-1}) - (\text{A1-2}), \quad \text{say.} \end{aligned}$$

First, we have

$$\begin{aligned} (\text{A1-1}) &= \frac{\eta}{h} \sum_{i=1}^m (c_{i+1} - c_i) \left[ \frac{1}{T} \sum_{s=1}^T K\left(\frac{t-s}{Th}\right) \cdot 1\left\{\frac{s}{T} \leq \lambda_i\right\} \cdot 1\left\{\frac{t}{T} > \lambda_i\right\} \right] \\ &= \frac{\eta}{h} \sum_{i=1}^m (c_{i+1} - c_i) \left[ \left( \int_0^1 K\left(\frac{v-u}{h}\right) 1\{u \leq \lambda_i\} du \right) \cdot 1\{v > \lambda_i\} \cdot (1 + o(1)) \right] \\ &= \frac{\eta}{h} \sum_{i=1}^m (c_{i+1} - c_i) \left[ \left( \int_{(v-1)/h}^{v/h} K(w) \cdot 1\{v - hw \leq \lambda_i\} \cdot h dw \right) \cdot 1\{v > \lambda_i\} \cdot (1 + o(1)) \right] \\ &= \eta \left[ \sum_{i=1}^m (c_{i+1} - c_i) \left( \int_{(v-\lambda_i)/h}^{v/h} K(w) dw \right) \cdot 1\{v > \lambda_i\} \right] \cdot (1 + o(1)), \end{aligned}$$

where  $u = s/T$  and  $v = t/T$ . Similarly, we have

$$(\text{A1-2}) = \eta \left[ \sum_{i=1}^m (c_{i+1} - c_i) \left( \int_{(v-1)/h}^{(v-\lambda_i)/h} K(w) dw \right) \cdot 1\{v \leq \lambda_i\} \right] \cdot (1 + o(1)).$$

Therefore,

$$\begin{aligned} \check{\theta}_t &= \eta \left[ \sum_{i=1}^m (c_{i+1} - c_i) \left\{ \left( \int_{(v-\lambda_i)/h}^{v/h} K(w) dw \right) \cdot 1\{v > \lambda_i\} \right. \right. \\ &\quad \left. \left. - \left( \int_{(v-1)/h}^{(v-\lambda_i)/h} K(w) dw \right) \cdot 1\{v \leq \lambda_i\} \right\} \right] (1 + o(1)), \quad (3) \end{aligned}$$

so that

$$\check{\check{\theta}}_t = \tilde{O}(\eta). \quad (4)$$

Let  $F = T^{-1} \sum_{t=j+1}^T \check{\check{u}}_t \check{\check{\theta}}_{t-j}$ . Then, we have

$$\begin{aligned} E(F^2) &= \frac{1}{T^2} \sum_{t=j+1}^T \sum_{t'=j+1}^T E(\check{\check{u}}_t \check{\check{u}}_{t'}) \check{\check{\theta}}_{t-j} \check{\check{\theta}}_{t'-j} \\ &= \tilde{O}\left(\frac{1}{T^2} \cdot T^2 \cdot \frac{\eta^2}{Th}\right) = \tilde{O}\left(\frac{\eta^2}{Th}\right), \end{aligned}$$

because  $E(\check{\check{u}}_t \check{\check{u}}_{t'}) = \tilde{O}((Th)^{-1})$ ,<sup>1</sup> and (4). Therefore,  $F = \tilde{O}_p(\eta/\sqrt{Th})$  and  $T^{-1} \sum_{t=j+1}^T \check{\check{u}}_t \check{\check{\theta}}_{t-j} = \tilde{O}_p(\eta/\sqrt{Th})$ . ■

**Proof of (c).** Let  $G = T^{-1} \sum_{t=j+1}^T u_t \check{\check{\theta}}_{t-j}$ . Then,

$$\begin{aligned} E(G^2) &= \frac{1}{T^2} \sum_{t=j+1}^T E(u_t^2) \check{\check{\theta}}_{t-j}^2 + \frac{1}{T^2} \sum_{t=j+1}^T \sum_{t'=j+1, t \neq t'}^T E(u_t u_{t'}) \check{\check{\theta}}_{t-j} \check{\check{\theta}}_{t'-j} \\ &= G_1 + G_2, \quad \text{say.} \end{aligned}$$

First, we can easily see that  $G_1 = \tilde{O}(T^{-2} \cdot T \cdot \eta^2) = \tilde{O}(\eta^2/T)$  using (4). For  $G_2$ , following Juhl and Xiao (2009), we have

$$\begin{aligned} G_2 &\leq \frac{1}{T^2} \sum_{t=j+1}^T \sum_{t'=j+1, t \neq t'}^T |E(u_t u_{t'})| \cdot \sup_{t, t'} \left| \check{\check{\theta}}_{t-j} \check{\check{\theta}}_{t'-j} \right| \\ &\leq \frac{1}{T^2} \sum_{t=j+1}^T \sum_{t'=j+1, t \neq t'}^T \beta_{t-t'}^{\frac{\delta}{1+\delta}} M^{\frac{1}{1+\delta}} \cdot O(\eta^2) \\ &= O\left(\frac{1}{T^2} \cdot T \cdot \eta^2\right) = O\left(\frac{\eta^2}{T}\right). \end{aligned}$$

Therefore, we have  $E(G^2) = \tilde{O}(\eta^2/T)$ , so that  $G = \tilde{O}_p(\eta/\sqrt{T})$  and  $T^{-1} \sum_{t=j+1}^T u_t \check{\check{\theta}}_{t-j} = \tilde{O}_p(\eta/\sqrt{T})$ . ■

---

<sup>1</sup>This is proved in Juhl and Xiao (2009).

**Proof of (e).** Using (3), we have

$$\begin{aligned}
\check{\check{\theta}}_t^2 &= \eta^2 \left[ \sum_{i=1}^m (c_{i+1} - c_i)^2 \left\{ \left( \int_{(v-\lambda_i)/h}^{v/h} K(w)dw \right)^2 \cdot 1\{v > \lambda_i\} + \left( \int_{(v-1)/h}^{(v-\lambda_i)/h} K(w)dw \right)^2 \cdot 1\{v \leq \lambda_i\} \right\} \right. \\
&\quad + \sum_{i=1}^m \sum_{j=1, i \neq j}^m (c_{i+1} - c_i)(c_{j+1} - c_j) \\
&\quad \cdot \left\{ \left( \int_{(v-\lambda_i)/h}^{v/h} K(w)dw \right) \left( \int_{(v-\lambda_j)/h}^{v/h} K(w)dw \right) 1\{v > \lambda_i\} 1\{v > \lambda_j\} \right. \\
&\quad - \left( \int_{(v-\lambda_i)/h}^{v/h} K(w)dw \right) \left( \int_{(v-1)/h}^{(v-\lambda_j)/h} K(w)dw \right) 1\{v > \lambda_i\} 1\{v \leq \lambda_j\} \\
&\quad - \left( \int_{(v-1)/h}^{(v-\lambda_i)/h} K(w)dw \right) \left( \int_{(v-\lambda_j)/h}^{v/h} K(w)dw \right) 1\{v \leq \lambda_i\} 1\{v > \lambda_j\} \\
&\quad \left. \left. + \left( \int_{(v-1)/h}^{(v-\lambda_i)/h} K(w)dw \right) \left( \int_{(v-1)/h}^{(v-\lambda_j)/h} K(w)dw \right) 1\{v \leq \lambda_i\} 1\{v \leq \lambda_j\} \right\} \right] (1 + o(1)),
\end{aligned}$$

so that

$$\begin{aligned}
& \frac{1}{T} \sum_{t=j+1}^T \check{\check{\theta}}_t \check{\check{\theta}}_{t-j} \\
& \sim \frac{1}{T} \sum_{t=1}^T \check{\check{\theta}}_t^2 \\
& = \eta^2 \sum_{i=1}^m (c_{i+1} - c_i)^2 \left\{ \frac{1}{T} \sum_{t=1}^T \left( \int_{(v-\lambda_i)/h}^{v/h} K(w) dw \right)^2 1\{v > \lambda_i\} \right. \\
& \quad \left. + \frac{1}{T} \sum_{t=1}^T \left( \int_{(v-1)/h}^{(v-\lambda_i)/h} K(w) dw \right)^2 1\{v \leq \lambda_i\} \right\} \\
& + \eta^2 \sum_{i=1}^m \sum_{j=1, i \neq j}^m (c_{i+1} - c_i)(c_{j+1} - c_j) \\
& \quad \cdot \left\{ \frac{1}{T} \sum_{t=1}^T \left( \int_{(v-\lambda_i)/h}^{v/h} K(w) dw \right) \left( \int_{(v-\lambda_j)/h}^{v/h} K(w) dw \right) 1\{v > \lambda_i\} 1\{v > \lambda_j\} \right. \\
& \quad - \frac{1}{T} \sum_{t=1}^T \left( \int_{(v-\lambda_i)/h}^{v/h} K(w) dw \right) \left( \int_{(v-1)/h}^{(v-\lambda_j)/h} K(w) dw \right) 1\{v > \lambda_i\} 1\{v \leq \lambda_j\} \\
& \quad - \frac{1}{T} \sum_{t=1}^T \left( \int_{(v-1)/h}^{(v-\lambda_i)/h} K(w) dw \right) \left( \int_{(v-\lambda_j)/h}^{v/h} K(w) dw \right) 1\{v \leq \lambda_i\} 1\{v > \lambda_j\} \\
& \quad \left. + \frac{1}{T} \sum_{t=1}^T \left( \int_{(v-1)/h}^{(v-\lambda_i)/h} K(w) dw \right) \left( \int_{(v-1)/h}^{(v-\lambda_j)/h} K(w) dw \right) 1\{v \leq \lambda_i\} 1\{v \leq \lambda_j\} \right\} \\
& = (\text{A2-1}) + \{(\text{A2-2}) - (\text{A2-3}) - (\text{A2-4}) + (\text{A2-5})\}, \quad \text{say.}
\end{aligned}$$

Let us consider (A2-1). Since

$$\begin{aligned}
& \frac{1}{T} \sum_{t=1}^T \left( \int_{(v-\lambda_i)/h}^{v/h} K(w) dw \right)^2 1\{v > \lambda_i\} + \frac{1}{T} \sum_{t=1}^T \left( \int_{(v-1)/h}^{(v-\lambda_i)/h} K(w) dw \right)^2 1\{v \leq \lambda_i\} \\
& = \left[ \int_{\lambda_i}^1 \left( \int_{(v-\lambda_i)/h}^{v/h} K(w) dw \right)^2 dv + \int_0^{\lambda_i} \left( \int_{(v-1)/h}^{(v-\lambda_i)/h} K(w) dw \right)^2 dv \right] (1 + o(1)) \\
& = h \left[ \int_0^{(1-\lambda_i)/h} \left( \int_x^{x+\lambda_i/h} K(w) dw \right)^2 dx + \int_{-\lambda_i/h}^0 \left( \int_{x-(1-\lambda_i)/h}^x K(w) dw \right)^2 dx \right] (1 + o(1)) \\
& = h \left[ \int_0^\infty \left( \int_x^\infty K(w) dw \right)^2 dx + \int_{-\infty}^0 \left( \int_{-\infty}^x K(w) dw \right)^2 dx \right] (1 + o(1)),
\end{aligned}$$

we have

$$\begin{aligned}
(\text{A2-1}) & = h\eta^2 \sum_{i=1}^m (c_{i+1} - c_i)^2 \left[ \int_0^\infty \left( \int_x^\infty K(w) dw \right)^2 dx + \int_{-\infty}^0 \left( \int_{-\infty}^x K(w) dw \right)^2 dx \right] (1 + o(1)) \\
& = O(h\eta^2).
\end{aligned}$$

Next, consider (A2-2). When  $i < j$ ,

$$\begin{aligned}
& \frac{1}{T} \sum_{t=1}^T \left( \int_{(v-\lambda_i)/h}^{v/h} K(w)dw \right) \left( \int_{(v-\lambda_j)/h}^{v/h} K(w)dw \right) 1\{v > \lambda_i\} 1\{v > \lambda_j\} \\
&= \frac{1}{T} \sum_{t=1}^T \left( \int_{(v-\lambda_i)/h}^{v/h} K(w)dw \right) \left( \int_{(v-\lambda_j)/h}^{v/h} K(w)dw \right) 1\{v > \lambda_j\} \\
&= \left\{ \int_{\lambda_j}^1 \left( \int_{(v-\lambda_i)/h}^{v/h} K(w)dw \right) \left( \int_{(v-\lambda_j)/h}^{v/h} K(w)dw \right) dv \right\} (1 + o(1)) \\
&= h \left\{ \int_0^{(1-\lambda_j)/h} \left( \int_{x-(\lambda_j-\lambda_i)/h}^{x+\lambda_j/h} K(w)dw \right) \left( \int_x^{x+\lambda_j/h} K(w)dw \right) dx \right\} (1 + o(1)) \\
&= h \left\{ \int_0^\infty \left( \int_{-\infty}^\infty K(w)dw \right) \left( \int_x^\infty K(w)dw \right) dx \right\} (1 + o(1)) \\
&= h \left\{ \int_0^\infty \left( \int_x^\infty K(w)dw \right) dx \right\} (1 + o(1)),
\end{aligned}$$

and similarly when  $i > j$ ,

$$\begin{aligned}
& \frac{1}{T} \sum_{t=1}^T \left( \int_{(v-\lambda_i)/h}^{v/h} K(w)dw \right) \left( \int_{(v-\lambda_j)/h}^{v/h} K(w)dw \right) 1\{v > \lambda_i\} 1\{v > \lambda_j\} \\
&= h \left\{ \int_0^\infty \left( \int_x^\infty K(w)dw \right) dx \right\} (1 + o(1)).
\end{aligned}$$

Using the results above, we get

$$\begin{aligned}
\text{(A2-2)} &= h\eta^2 \left\{ \sum_{i=1}^m \sum_{j=1, i \neq j}^m (c_{i+1} - c_i)(c_{j+1} - c_j) \int_0^\infty \left( \int_x^\infty K(w)dw \right) dx \right\} (1 + o(1)) \\
&= O(h\eta^2).
\end{aligned}$$

Then, let us consider (A2-3). When  $i < j$ , we have

$$\begin{aligned}
& \frac{1}{T} \sum_{t=1}^T \left( \int_{(v-\lambda_i)/h}^{v/h} K(w)dw \right) \left( \int_{(v-1)/h}^{(v-\lambda_j)/h} K(w)dw \right) 1\{v > \lambda_i\} 1\{v \leq \lambda_j\} \\
&= \frac{1}{T} \sum_{t=1}^T \left( \int_{(v-\lambda_i)/h}^{v/h} K(w)dw \right) \left( \int_{(v-1)/h}^{(v-\lambda_j)/h} K(w)dw \right) 1\{\lambda_i < v \leq \lambda_j\} \\
&= h \left\{ \int_{\lambda_i}^{\lambda_j} \left( \int_{(v-\lambda_i)/h}^{v/h} K(w)dw \right) \left( \int_{(v-1)/h}^{(v-\lambda_j)/h} K(w)dw \right) dx \right\} (1 + o(1)) \\
&= h \left\{ \int_0^{(\lambda_j-\lambda_i)/h} \left( \int_x^{x+\lambda_i/h} K(w)dw \right) \left( \int_{x-(1-\lambda_i)/h}^{x-(\lambda_j-\lambda_i)/h} K(w)dw \right) dx \right\} (1 + o(1)) \\
&= h \left\{ \int_0^\infty \left( \int_x^\infty K(w)dw \right) r(x)dx \right\} (1 + o(1)) \\
&= o(h),
\end{aligned}$$

where  $r(x) \rightarrow 0$  as  $T \rightarrow \infty$ . In addition, when  $i > j$ ,

$$\frac{1}{T} \sum_{t=1}^T \left( \int_{(v-\lambda_i)/h}^{v/h} K(w) dw \right) \left( \int_{(v-1)/h}^{(v-\lambda_j)/h} K(w) dw \right) 1\{v > \lambda_i\} 1\{v \leq \lambda_j\} = 0,$$

because  $\lambda_i > \lambda_j$ . Therefore, (A2-3) =  $o(h\eta^2)$ .

Similarly, we can prove that (A2-4) =  $o(h\eta^2)$  and (A2-5) =  $O(h\eta^2)$ , so that  $T^{-1} \sum_{t=j+1}^T \check{\theta}_t \check{\theta}_{t-j} = O(h\eta^2)$ . ■

**Lemma 3** *Under Assumptions 1–6, we have*

$$\begin{aligned} (a) \quad & \frac{1}{T} \sum_{t=2}^T u_t \check{\theta}_{t-1} - \frac{1}{T} \sum_{t=2}^T u_{t-1} \check{\theta}_{t-1} = O_p\left(\frac{\eta}{T}\right), \\ (b) \quad & \frac{1}{T} \sum_{t=2}^T \check{\theta}_t u_{t-1} - \frac{1}{T} \sum_{t=2}^T \check{\theta}_{t-1} u_{t-1} = O_p\left(\frac{\eta}{T}\right), \\ (c) \quad & \frac{1}{T} \sum_{t=2}^T \check{u}_t \check{\theta}_{t-1} - \frac{1}{T} \sum_{t=2}^T \check{u}_{t-1} \check{\theta}_{t-1} = \tilde{O}_p\left(\frac{\eta}{T^{3/2} h^{3/2}}\right), \\ (d) \quad & \frac{1}{T} \sum_{t=2}^T \check{\theta}_t \check{u}_{t-1} - \frac{1}{T} \sum_{t=2}^T \check{\theta}_{t-1} \check{u}_{t-1} = \tilde{O}_p\left(\frac{\eta}{T^{3/2} h^{3/2}}\right), \\ (e) \quad & \frac{1}{T} \sum_{t=2}^T \check{\theta}_t \check{\theta}_{t-1} - \frac{1}{T} \sum_{t=2}^T \check{\theta}_{t-1}^2 = O_p\left(\frac{\eta^2}{T}\right). \end{aligned}$$

### Proof of Lemma 3

**Proofs of (a) and (b).**

For (a), we have

$$\begin{aligned} \check{\theta}_t - \check{\theta}_{t-1} &= \frac{1}{Th} \sum_{s=1}^T \left[ K\left(\frac{t-s}{Th}\right) \left\{ \theta\left(\frac{t}{T}\right) - \theta\left(\frac{s}{T}\right) \right\} - K\left(\frac{t-1-s}{Th}\right) \left\{ \theta\left(\frac{t-1}{T}\right) - \theta\left(\frac{s}{T}\right) \right\} \right] \\ &= \frac{1}{Th} \sum_{s=1}^T K\left(\frac{t-s}{Th}\right) \left\{ \theta\left(\frac{t}{T}\right) - \theta\left(\frac{t-1}{T}\right) \right\} \\ &\quad + \frac{1}{Th} \sum_{s=1}^T \theta\left(\frac{t-1}{T}\right) \left\{ K\left(\frac{t-s}{Th}\right) - K\left(\frac{t-1-s}{Th}\right) \right\} \\ &\quad - \frac{1}{Th} \sum_{s=1}^T \theta\left(\frac{s}{T}\right) \left\{ K\left(\frac{t-s}{Th}\right) - K\left(\frac{t-1-s}{Th}\right) \right\}. \end{aligned} \tag{5}$$



Therefore, we have

$$\begin{aligned}
& \frac{1}{T} \sum_{t=2}^T u_t \check{\theta}_{t-1} - \frac{1}{T} \sum_{t=2}^T u_{t-1} \check{\theta}_{t-1} \\
&= -\frac{1}{T} \sum_{t=2}^T u_t (\check{\theta}_t - \check{\theta}_{t-1}) + \frac{1}{T} u_T \check{\theta}_T - \frac{1}{T} u_1 \check{\theta}_1 \\
&\sim -\frac{1}{T} \sum_{t=2}^T u_t (\check{\check{\theta}}_t - \check{\check{\theta}}_{t-1}) + \frac{1}{T} u_T \check{\check{\theta}}_T - \frac{1}{T} u_1 \check{\check{\theta}}_1 \\
&= -\frac{1}{T} \sum_{t=2}^T u_t \left[ \frac{1}{Th} \sum_{s=1}^T K\left(\frac{t-s}{Th}\right) \left\{ \theta\left(\frac{t}{T}\right) - \theta\left(\frac{t-1}{T}\right) \right\} \right] \\
&\quad - \frac{1}{T} \sum_{t=2}^T u_t \left[ \frac{1}{Th} \sum_{s=1}^T \theta\left(\frac{t-1}{T}\right) \left\{ K\left(\frac{t-s}{Th}\right) - K\left(\frac{t-1-s}{Th}\right) \right\} \right] \\
&\quad + \frac{1}{T} \sum_{t=2}^T u_t \left[ \frac{1}{Th} \sum_{s=1}^T \theta\left(\frac{s}{T}\right) \left\{ K\left(\frac{t-s}{Th}\right) - K\left(\frac{t-1-s}{Th}\right) \right\} \right] \\
&\quad + \frac{1}{T} u_T \check{\check{\theta}}_T - \frac{1}{T} u_1 \check{\check{\theta}}_1 \\
&= -(\text{A3-1}) - (\text{A3-2}) + (\text{A3-3}) + (\text{A3-4}) - (\text{A3-5}), \quad \text{say.}
\end{aligned}$$

First, we have  $(\text{A3-1}) = O_p(\eta/T)$  because

$$\frac{1}{Th} \sum_{s=1}^T K\left(\frac{t-s}{Th}\right) \left\{ \theta\left(\frac{t}{T}\right) - \theta\left(\frac{t-1}{T}\right) \right\} = \begin{cases} O(\eta) & \text{for } t = T_i + 1 \ (i = 1, \dots, m), \\ 0 & \text{otherwise.} \end{cases} \quad (6)$$

Next, we prove that  $(\text{A3-2}) = \tilde{O}_p(\eta/(T^{3/2}h))$ . We have

$$\begin{aligned}
(\text{A3-2}) &= \frac{1}{T} \sum_{t=2}^T u_t \left[ \frac{1}{Th} \sum_{s=1}^T \theta\left(\frac{t-1}{T}\right) \left\{ K\left(\frac{t-s}{Th}\right) - K\left(\frac{t-1-s}{Th}\right) \right\} \right] \\
&= \sum_{i=1}^{m+1} \left[ \frac{1}{T} \sum_{t=T_{i-1}+2}^{T_i+1} u_t \cdot \frac{c_i \eta}{Th} \left\{ K\left(\frac{t-1}{Th}\right) - K\left(\frac{t-1-T}{Th}\right) \right\} \right] \\
&\quad - \frac{1}{T} u_{T+1} \cdot \frac{c_{m+1} \eta}{Th} \left[ K\left(\frac{1}{h}\right) - K(0) \right] \\
&= (\text{A3-2-1}) - (\text{A3-2-2}), \quad \text{say.}
\end{aligned}$$

Here we consider  $(\text{A3-2-1})$ . Let us define

$$W_{1i} = \frac{1}{T} \sum_{t=T_{i-1}+2}^{T_i+1} u_t \cdot \frac{c_i \eta}{Th} \left\{ K\left(\frac{t-1}{Th}\right) - K\left(\frac{t-1-T}{Th}\right) \right\}.$$

Then,

$$\begin{aligned}
W_{1i}^2 &\leq \frac{1}{T^2} \sum_{t=T_{i-1}+2}^{T_i+1} u_t^2 \cdot \frac{c_i^2 \eta^2}{T^2 h^2} \left\{ K\left(\frac{t-1}{Th}\right) - K\left(\frac{t-1-T}{Th}\right) \right\}^2 \\
&\quad + \frac{1}{T^2} \sum_{t=T_{i-1}+2}^{T_i+1} \sum_{t'=T_{i-1}+2, t \neq t'}^{T_i+1} |u_t u_{t'}| \\
&\quad \cdot \frac{c_i^2 \eta^2}{T^2 h^2} \left| \left\{ K\left(\frac{t-1}{Th}\right) - K\left(\frac{t-1-T}{Th}\right) \right\} \left\{ K\left(\frac{t'-1}{Th}\right) - K\left(\frac{t'-1-T}{Th}\right) \right\} \right|,
\end{aligned}$$

so that

$$\begin{aligned}
E(W_{1i}^2) &\leq \frac{1}{T^2} \sum_{t=T_{i-1}+2}^{T_i+1} E(u_t^2) \cdot \frac{4C^2 \cdot c_i^2 \eta^2}{T^2 h^2} + \frac{1}{T^2} \sum_{t=T_{i-1}+2}^{T_i+1} \sum_{t'=T_{i-1}+2, t \neq t'}^{T_i+1} E|u_t u_{t'}| \cdot \frac{4C^2 \cdot c_i^2 \eta^2}{T^2 h^2} \\
&\leq \frac{1}{T^2} \sum_{t=T_{i-1}+2}^{T_i+1} E(u_t^2) \cdot \frac{4C^2 \cdot c_i^2 \eta^2}{T^2 h^2} + \frac{1}{T^2} \sum_{t=T_{i-1}+2}^{T_i+1} \sum_{t'=T_{i-1}+2, t \neq t'}^{T_i+1} \beta_{t-t'}^{\frac{\delta}{1+\delta}} M^{\frac{1}{1+\delta}} \cdot \frac{4C^2 \cdot c_i^2 \eta^2}{T^2 h^2} \\
&= O\left(\frac{\eta^2}{T^3 h^2}\right),
\end{aligned}$$

because  $\sup_x |K(x)| \leq C$  by Assumption 3 (b). Therefore, we have  $(A3-2-1) = \tilde{O}_p(\eta/(T^{3/2}h))$ .

In addition,

$$\begin{aligned}
|(A3-2-2)| &\leq \frac{1}{T} \cdot \left| \frac{c_{m+1} \eta}{Th} \right| \cdot |u_{T+1}| \cdot 2C \\
&= O_p\left(\frac{\eta}{T^2 h}\right),
\end{aligned}$$

so that  $(A3-2) = \tilde{O}_p(\eta/(T^{3/2}h))$ .

Similarly, we can prove that  $(A3-3) = \tilde{O}_p(\eta/(T^{3/2}h))$ . We can easily see that  $(A3-4) = \tilde{O}_p(\eta/T)$  and  $(A3-5) = \tilde{O}_p(\eta/T)$ .

Therefore, we have  $T^{-1} \sum_{t=2}^T u_t \check{\theta}_{t-1} - T^{-1} \sum_{t=2}^T u_{t-1} \check{\theta}_{t-1} = O_p(\eta/T) + \tilde{O}_p(\eta/(T^{3/2}h)) = O_p(\eta/T)$  because  $T^{1/4}h \rightarrow \infty$  as  $T \rightarrow \infty$  by Assumption 5. In the same way, we can prove (b). ■

**Proofs of (c) and (d).** Using (5), we have

$$\begin{aligned}
& \frac{1}{T} \sum_{t=2}^T \check{u}_t \check{\theta}_{t-1} - \frac{1}{T} \sum_{t=2}^T \check{u}_{t-1} \check{\theta}_{t-1} \\
& \sim -\frac{1}{T} \sum_{t=2}^T \check{u}_t \left[ \frac{1}{Th} \sum_{s=1}^T K\left(\frac{t-s}{Th}\right) \left\{ \theta\left(\frac{t}{T}\right) - \theta\left(\frac{t-1}{T}\right) \right\} \right] \\
& \quad - \frac{1}{T} \sum_{t=2}^T \check{u}_t \left[ \frac{1}{Th} \sum_{s=1}^T \theta\left(\frac{t-1}{T}\right) \left\{ K\left(\frac{t-s}{Th}\right) - K\left(\frac{t-1-s}{Th}\right) \right\} \right] \\
& \quad + \frac{1}{T} \sum_{t=2}^T \check{u}_t \left[ \frac{1}{Th} \sum_{s=1}^T \theta\left(\frac{s}{T}\right) \left\{ K\left(\frac{t-s}{Th}\right) - K\left(\frac{t-1-s}{Th}\right) \right\} \right] \\
& \quad + \frac{1}{T} \check{u}_T \check{\theta}_T - \frac{1}{T} \check{u}_1 \check{\theta}_1 \\
& = -(\text{A4-1}) - (\text{A4-2}) + (\text{A4-3}) + (\text{A4-4}) - (\text{A4-5}), \quad \text{say.}
\end{aligned}$$

First,  $(\text{A4-1}) = \tilde{O}_p(\eta/(T^{3/2}h^{1/2}))$  because  $\check{u}_t = \tilde{O}_p(1/\sqrt{Th})$  and (6). We also obtain  $(\text{A4-2}) = \tilde{O}_p(\eta/(T^{3/2}h^{3/2}))$ ,  $(\text{A4-3}) = \tilde{O}_p(\eta/(T^{3/2}h^{3/2}))$ ,  $(\text{A4-4}) = \tilde{O}_p(\eta/(T^{3/2}h^{1/2}))$  and  $(\text{A4-5}) = \tilde{O}_p(\eta/(T^{3/2}h^{1/2}))$  in the same way as in the proof of (a). Therefore, we have  $T^{-1} \sum_{t=2}^T \check{u}_t \check{\theta}_{t-1} - T^{-1} \sum_{t=2}^T \check{u}_{t-1} \check{\theta}_{t-1} = \tilde{O}_p(\eta/(T^{3/2}h^{1/2})) + \tilde{O}_p(\eta/(T^{3/2}h^{3/2})) = \tilde{O}_p(\eta/(T^{3/2}h^{3/2}))$ . (d) can be proved similarly. ■

**Proof of (e).**

$$\begin{aligned}
& \frac{1}{T} \sum_{t=2}^T \check{\theta}_t \check{\theta}_{t-1} - \frac{1}{T} \sum_{t=2}^T \check{\theta}_{t-1}^2 \\
& \sim \frac{1}{T} \sum_{t=1}^T \check{\theta}_t \check{\theta}_{t-1} - \frac{1}{T} \sum_{t=1}^T \check{\theta}_{t-1}^2 \\
& = -\frac{1}{T} \sum_{t=1}^T \check{\theta}_{t-1} \left[ \frac{1}{Th} \sum_{s=1}^T K\left(\frac{t-s}{Th}\right) \left\{ \theta\left(\frac{t}{T}\right) - \theta\left(\frac{t-1}{T}\right) \right\} \right] \\
& \quad - \frac{1}{T} \sum_{t=1}^T \check{\theta}_{t-1} \left[ \frac{1}{Th} \sum_{s=1}^T \theta\left(\frac{t-1}{T}\right) \left\{ K\left(\frac{t-s}{Th}\right) - K\left(\frac{t-1-s}{Th}\right) \right\} \right] \\
& \quad + \frac{1}{T} \sum_{t=1}^T \check{\theta}_{t-1} \left[ \frac{1}{Th} \sum_{s=1}^T \theta\left(\frac{s}{T}\right) \left\{ K\left(\frac{t-s}{Th}\right) - K\left(\frac{t-1-s}{Th}\right) \right\} \right] \\
& = -(\text{A5-1}) - (\text{A5-2}) + (\text{A5-3}), \quad \text{say.}
\end{aligned}$$

First,  $(\text{A5-1}) = O(\eta^2/T)$  because  $\check{\theta}_{T_i+1} = O(\eta)$  for  $i = 1, \dots, m$  and (6). For (A5-2), we

have

$$\begin{aligned}
(\text{A5-2}) &= \sum_{i=1}^{m+1} \left[ \frac{1}{T} \sum_{t=T_{i-1}+2}^{T_i+1} \check{\theta}_{t-1} \left[ \frac{c_i \eta}{Th} \left\{ K\left(\frac{t-1}{Th}\right) - K\left(\frac{t-1-T}{Th}\right) \right\} \right] \right] \\
&\quad + \left[ \frac{1}{T} \check{\theta}_1 \cdot \frac{c_1 \eta}{Th} \left\{ K(0) - K\left(-\frac{1}{h}\right) \right\} - \frac{1}{T} \check{\theta}_{T+1} \cdot \frac{c_{m+1}}{Th} \left\{ K\left(\frac{1}{h}\right) - K(0) \right\} \right] \\
&= (\text{A5-2-1}) + (\text{A5-2-2}), \quad \text{say.}
\end{aligned}$$

First, consider (A5-2-1). Here we define

$$W_{2i} = \frac{1}{T} \sum_{t=T_{i-1}+2}^{T_i+1} \check{\theta}_{t-1} \left[ \frac{c_i \eta}{Th} \left\{ K\left(\frac{t-1}{Th}\right) - K\left(\frac{t-1-T}{Th}\right) \right\} \right].$$

Then,

$$\begin{aligned}
|W_{2i}| &\leq \frac{1}{T} \sum_{t=T_{i-1}+2}^{T_i+1} |\check{\theta}_{t-1}| \cdot \left| \frac{c_i \eta}{Th} \right| \cdot \left| K\left(\frac{t-1}{Th}\right) - K\left(\frac{t-1-T}{Th}\right) \right| \\
&\leq \left( h\eta \int_{-\infty}^{\infty} |f(x)| dx \right) (1 + o(1)) \cdot \left| \frac{c_i \eta}{Th} \right| \cdot 2C \\
&= O\left(\frac{\eta^2}{T}\right),
\end{aligned}$$

where  $f(x) = \sum_{i=1}^m (c_{i+1} - c_i) \left[ \left( \int_{-\infty}^x K(w) dw \right) \cdot 1\{x < 0\} - \left( \int_x^{\infty} K(w) dw \right) \cdot 1\{x \geq 0\} \right]$ . Therefore,  $(\text{A5-2-1}) = \sum_{i=1}^{m+1} W_{2i} = \tilde{O}(\eta^2/T)$ . Moreover,

$$\begin{aligned}
|(\text{A5-2-2})| &\leq \frac{1}{T} \cdot |\check{\theta}_1| \cdot \left| \frac{c_1 \eta}{Th} \right| \cdot 2C + \frac{1}{T} \cdot |\check{\theta}_{T+1}| \cdot \left| \frac{c_{m+1} \eta}{Th} \right| \cdot 2C \\
&= \tilde{O}\left(\frac{\eta^2}{T^2 h}\right),
\end{aligned}$$

so that  $(\text{A5-2}) = \tilde{O}(\eta^2/T)$ . Similarly we obtain  $(\text{A5-3}) = \tilde{O}(\eta^2/T)$ , so that  $T^{-1} \sum_{t=2}^T \check{\theta}_t \check{\theta}_{t-1} - T^{-1} \sum_{t=2}^T \check{\theta}_{t-1}^2 = O(\eta^2/T)$ . ■

## References

- [1] Juhl, T. and Z. Xiao (2009), “Tests for Changing Mean with Monotonic Power,” *Journal of Econometrics* 148, 14–24.
